# Supplementary material for: Increase in Ischemia-Modified Albumin and Pregnancy-Associated Plasma Protein-A in COVID-19 Patients
Source: MDPI journal article supplement (doi:10.3390/jcm10235474), 2021-11-23
Supplement: s1 [file s1]

## Supplementary Materials

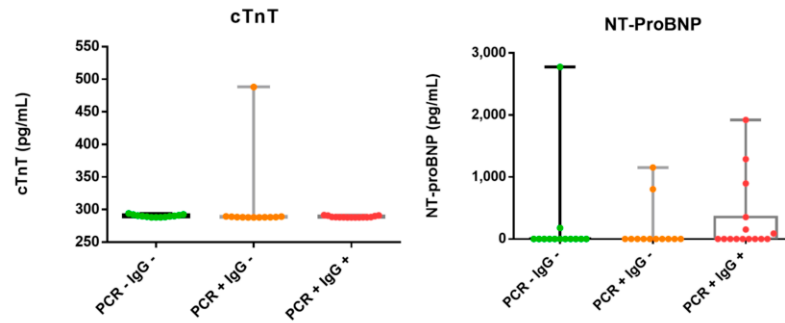

**Figure S1.** Box-and-whisker plots of classical cardiac biomarker concentrations in patient samples. PCR- IgG-, patients with a discharge diagnosis of COVID-19(green); PCR+ IgG-, patients with early SARS-CoV-2 infection(orange); PCR+ IgG+, patients with active SARS-CoV-2 infection(red). Data represent the mean  $\pm$  S.D.

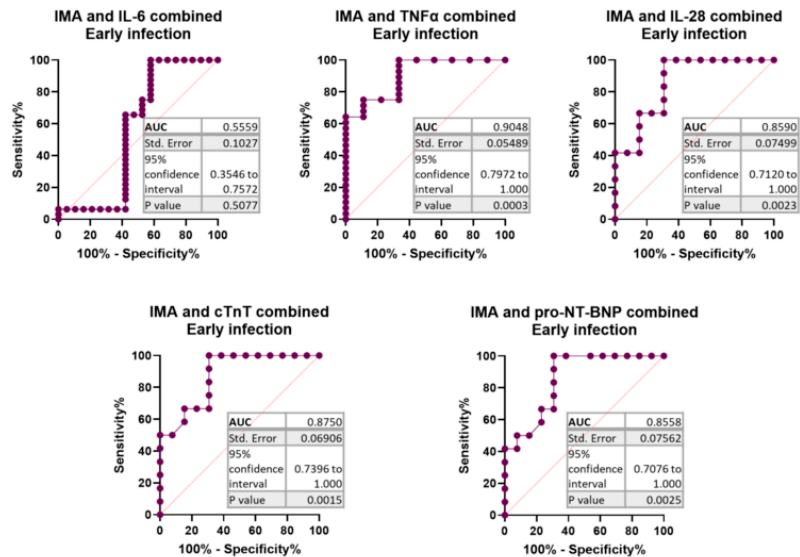

**Figure S2.** Receiver operating characteristic (ROC) curves and area under the curve (AUC) of the combination of ischemia-modified albumin (IMA) with interleukin 6 (IL-6), tumor necrosis factor alpha (TNF- $\alpha$ ), interleukin 28 (IL-28), cardiac troponin T (cTnT) or pro N-terminal of B natriuretic peptide (NT-proBNP) in the early infection phase of COVID-19.
